# Supplementary material for: Genome assembly of Nannochloropsis oceanica provides evidence of host nucleus overthrow by the symbiont nucleus during speciation
Source: PubMed Central journal article supplement (PMC6610115; doi:10.1038/s42003-019-0500-9), 2019-07-03
Supplement: 42003_2019_500_MOESM1_ESM.pdf [file 42003_2019_500_MOESM1_ESM.pdf]

Supplementary Figures and Tables

Supplementary Figure 1

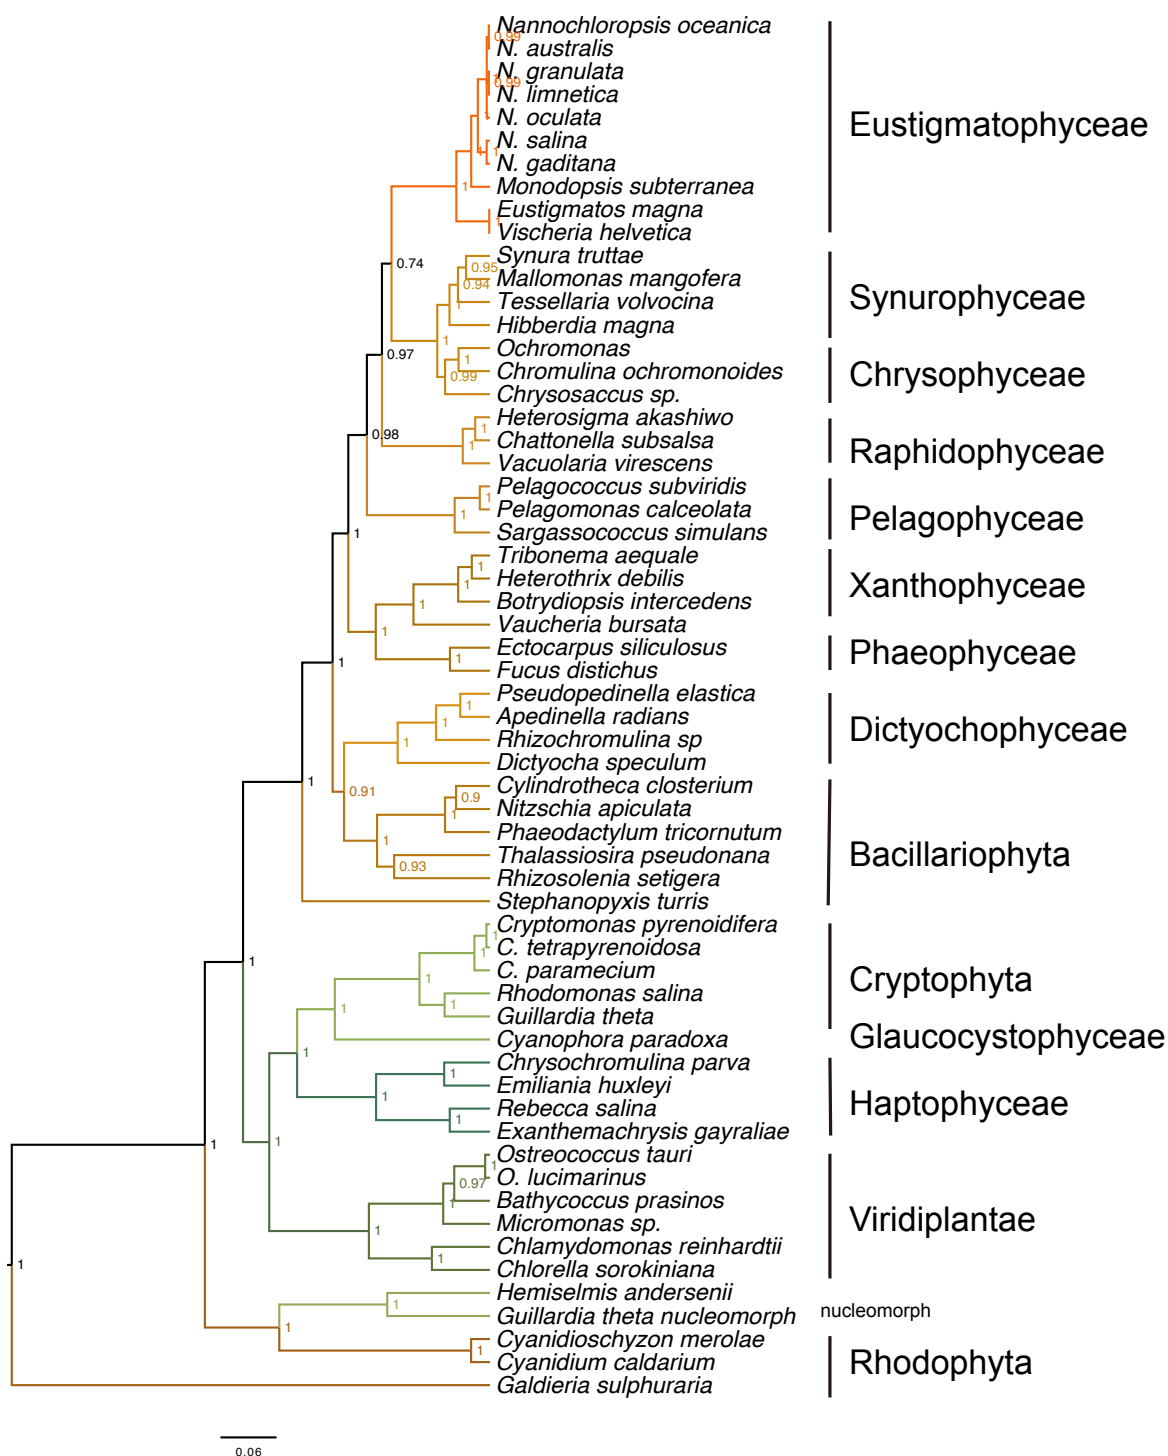

Supplementary Figure 1. The phylogenetic trees for 18S rDNA. The tree shows the consensus tree topology inferred by Bayesian analysis using alignments of 18S genes from NCBI. The scale bar indicates the nucleotide substitutions per site. This consensus topology derived from 512 trees, lnL = 22033.73

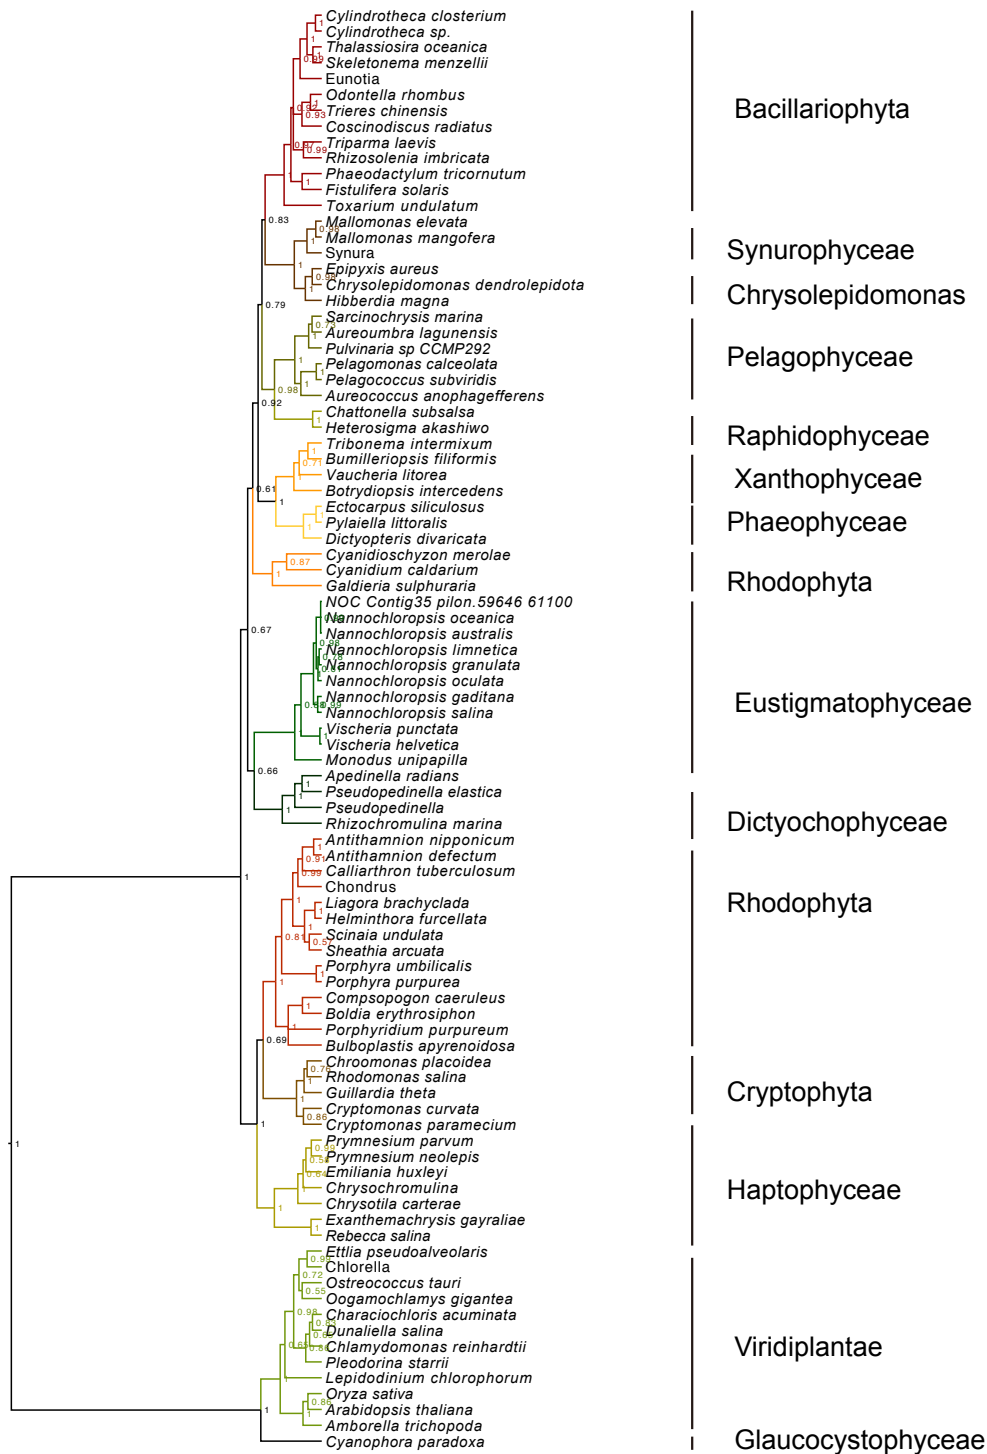

Supplementary Figure 2. The phylogenetic trees for *rbcL* protein. The tree shows the consensus tree topologies inferred by Bayesian analysis using alignments of *rbcL* proteins from NCBI. Scale bars represent 0.1 amino acid substitutions per site. In total, 439 aligned amino acid sites were analyzed. This consensus topology derived from 726 trees,  $\alpha = 0.47$  ( $0.41 < \alpha < 0.56$ ),  $p_i = 0.0019$  ( $0.0000007 < p_i < 0.0059$ ) and  $\ln L = 10364.8$ .

**Supplementary Table 1** Statistics of *Nannochloropsis oceanica* genome assembly

| Contig                      | number     |
|-----------------------------|------------|
| Assembled genome size (bp)  | 29,303,273 |
| Read coverage depth (fold)  | 112        |
| No. of contigs              | 129        |
| Contig N <sub>50</sub> (bp) | 664,749    |

**Supplementary Table 2** Clustering of contigs (scaffolds\*)

| Statistics                       | Result     |
|----------------------------------|------------|
| No. of contigs                   | 129        |
| Length of genome (bp)            | 29,303,273 |
| No. of contigs clustered         | 129        |
| Rate of contigs clustered (%)    | 100        |
| Length of contigs clustered (bp) | 29,303,273 |
| Rate of genome clustered (%)     | 100        |

\*, the genome of *N. oceanica* is sequenced with so-called the third generation sequencing techniques, which do not read the DNA molecules with different lengths, and the genome assembling yields the continuous DNA sequences corresponding to the contigs of the second generation sequencing techniques. These contigs are not upgraded into scaffolds, thus they can be called either contigs or scaffolds, here contigs for the convenience of description.

**Supplementary Table 3** Orientation and ordering of contigs\*

| Statistics                          | Result     |
|-------------------------------------|------------|
| No. of contigs ordered              | 128**      |
| Rate of contigs ordered (%)         | 99.22      |
| Length of contigs ordered           | 28,129,022 |
| Rate of contig length ordered (%)   | 95.99      |
| No. of contigs in trunks            | 86***      |
| Rate of contigs in trunks (%)       | 67.19      |
| Length of contig length in trunks   | 26,395,858 |
| Rate of contig length in trunks (%) | 93.84      |

\*, the word contig is used directly.

\*\* , one contig is a singleton which is not related with any other contigs.

\*\*\* , a trunk contains at least more than three contigs.

**Supplementary Table 4** The final assembly of *N. oceanica* genome with the assistance of HiC sequencing

|                                                   | Length of contigs (bp) | Length of pseudo-chromosomes (bp) | No. of contigs | No. of pseudo-chromosomes* |
|---------------------------------------------------|------------------------|-----------------------------------|----------------|----------------------------|
| Total                                             | 29,303,273             | 29,312,973                        | 129            | 32                         |
| Max. length                                       | 1,540,838              | 1,670,642                         | -              | -                          |
| No. contigs or pseudo-chromosomes $\geq 2,000$ bp | -                      | -                                 | 129            | 32                         |
| N50                                               | 664,749                | 1,148,430                         | 15             | 11                         |
| N60                                               | 422,361                | 961,379                           | 20             | 14                         |
| N70                                               | 350,531                | 877,916                           | 27             | 17                         |
| N80                                               | 195,573                | 814,094                           | 38             | 20                         |
| N90                                               | 82,245                 | 585,400                           | 62             | 25                         |

\*, the nucleus contains 30 pseudo-chromosomes, and mitochondrion and chloroplast contain one pseudo-chromosome each.

**Supplementary Table 5** Number of protein coding genes predicted with different strategies and their characteristics

|            |                       | No. of genes | Length (bp) | CDS (bp) | No. of exons | Length of exons (bp) | Length of introns (bp) |
|------------|-----------------------|--------------|-------------|----------|--------------|----------------------|------------------------|
| Strategy 1 | Augustus              | 6594         | 2456.0      | 554.6    | 2.75         | 554.6                | 533.9                  |
|            | GlimmerHMM            | 751          | 34043.0     | 455.7    | 12.58        | 455.7                | 2447.6                 |
|            | GeneMark              | 6620         | 2893.4      | 273.9    | 4.94         | 273.9                | 391.5                  |
|            | SNAP                  | 9143         | 1128.1      | 347.1    | 2.3          | 347.1                | 253.9                  |
| Strategy 2 | <i>N. gaditana</i>    | 7708         | 1075.3      | 320.2    | 2.47         | 320.2                | 195.1                  |
|            | <i>P. tricornutum</i> | 4663         | 848.7       | 336.4    | 1.99         | 336.4                | 184.2                  |
|            | <i>C. reinhardtii</i> | 3999         | 800.1       | 339.5    | 1.86         | 339.5                | 194.4                  |
|            | <i>C. variabilis</i>  | 4064         | 799.0       | 340.8    | 1.85         | 340.8                | 197.0                  |
|            | Available transcripts | 7905         | 2002.6      | 626.7    | 1.88         | 887.1                | 374.8                  |
| Integrated | EvidenceModeler       | 7330         | 2084.0      | 483.7    | 2.87         | 483.7                | 370.9                  |

The gene prediction was carried out with two strategies. With strategy one, the genes were predicted according to their characteristics (modeling) with diverse tools. With strategy two, the genes were predicted based on their similarities with the homologs in different known genomes found by searching with tools like blast and Genewise. All the predicted genes were integrated and documented as the non-redundant with EvidenceModeler. The predicted genes were characterized in their average length (bp), average CDS length (bp), average lengths of exon and introns (bp) and average numbers of exons.

**Supplementary Table 6** Statistics of non-protein coding RNA

| Type  | Copy no. | Average length (bp) | Total length (bp) | % of genome |
|-------|----------|---------------------|-------------------|-------------|
| miRNA | 15       | 129.9               | 1948              | 0.00665     |
| tRNA  | 105      | 81.2                | 8525              | 0.02909     |
| rRNA  | 18S      | 16                  | 380.3             | 0.02076     |
|       | 28S      | 8                   | 101.5             | 0.00277     |
|       | 5.8S     | 4                   | 155.0             | 0.00212     |
|       | 5S       | 9                   | 119.0             | 0.00365     |
|       | CD-box   | 3                   | 146               | 0.00149     |
| snRNA | HACA-box | 0                   | 0                 | 0           |
|       | Splicing | 2                   | 129               | 0.00088     |

**Supplementary Table 7** Statistics of repeated sequences predicted with different tools

| Prediction tool | Total length of repeats (bp) | Percentage in genome |
|-----------------|------------------------------|----------------------|
| RepeatMasker    | 3,306,419                    | 11.28                |
| ProteinMask     | 4,202,351                    | 14.34                |
| <i>de novo</i>  | 4,438,123                    | 15.15                |
| Trf             | 1,536,969                    | 5.25                 |
| Total           | 5,719,313                    | 19.52                |

Of the repeated sequences, tandem and interspersed repeats occupied 5% and 7.71% of the genome, respectively. Of the interspersed repeats, transposons occupied 4% of the genome while the long interspersed and long terminal repeats occupied 1.62% and 2.09% of the genome, respectively. Two types of transposons, CMC-EnSpm and MULE-MuDR were predominant; they had 5142 and 1049 copies, respectively. More repeated sequences were recognized in the genome of *N. oceanica* than in that of *N. oceanica* CCMP1779, which may be due to longer contigs obtained in this study than those obtained early (Vieler *et al.*, 2012).

**Supplementary Table 8** Length (bp) and percentage of classified repeated sequences in *N. oceanica* genome

|              | Rebase TEs |            | TE proteins |            | RepeatModeler |            | Combined TEs |            |
|--------------|------------|------------|-------------|------------|---------------|------------|--------------|------------|
|              | Length     | Percentage | Length      | Percentage | Length        | Percentage | Length       | Percentage |
| DNA          | 0          | 0          | 134,499     | 0.46       | 1,037,904     | 3.54       | 1,171,167    | 4.00       |
| LINE         | 0          | 0          | 208,839     | 0.71       | 265,698       | 0.91       | 474,305      | 1.62       |
| SINE         | 0          | 0          | 0           | 0          | 0             | 0          | 0            | 0.00       |
| LTR          | 0          | 0          | 574,434     | 1.96       | 39,156        | 0.13       | 613,154      | 2.09       |
| Other        | 0          | 0          | 117         | 0          | 585,003       | 2          | 585,120      | 2.00       |
| Unclassified | 3,306,419  | 11.28      | 3,313,337   | 11.31      | 2,596,495     | 8.86       | 3,452,335    | 11.78      |
| Total        | 3,306,419  | 11.28      | 4,202,351   | 14.34      | 4,438,123     | 15.15      | 5,446,334    | 18.59      |

LINE, long interspersed nuclear elements; SINE, short interspersed nuclear elements; LTR, long terminal repeats.

**Supplementary Table 9** Functional annotation of *N. oceanica* gene models against different data bases

| Database              | No. of models | Percentage |
|-----------------------|---------------|------------|
| NT                    | 477           | 6.51       |
| GO                    | 4776          | 65.16      |
| Map                   | 1969          | 26.86      |
| BLASTP                | 4835          | 65.96      |
| NR                    | 6814          | 92.96      |
| PFAM                  | 5194          | 70.86      |
| Eggnog                | 3783          | 51.61      |
| BLASTX                | 4663          | 63.62      |
| KO                    | 3130          | 42.70      |
| Total (non-redundant) | 7330*         | --         |

\*, a portion of genes are annotated as either putative or theoretical proteins.
